# Supplementary material for: Octahedral tin dioxide nanocrystals as high capacity anode materials for Na-ion batteries
Source: Royal Society of Chemistry journal article supplement (doi:10.1039/c3cp52037d), 2013-01-01
Supplement: c3cp52037d.pdf [file c3cp52037d.pdf]

## Support Information

### Octahedral Tin Dioxide Nanocrystals as High Capacity Anode Materials for Na-ion Batteries

Dawei Su<sup>a</sup>, Chengyin Wang<sup>b</sup>, Hyojun Ahn<sup>c</sup> and Guoxiu Wang<sup>\*a</sup>

*Received (in XXX, XXX) Xth XXXXXXXXXX 20XX, Accepted Xth XXXXXXXXXX 20XX*

**DOI: 10.1039/b000000x**

<sup>a</sup> *Centre for Clean Energy Technology, School of Chemistry and Forensic Science, Faculty of Science, University of Technology, Sydney, Australia.*

<sup>b</sup> *College of Chemistry and Chemical Engineering, Yangzhou University, 180 Si-Wang-Ting Road, Yangzhou 225002, China*

<sup>c</sup> *School of Materials Science and Engineering, Gyeongsang National University, Jinju, Gyeongnam 660-701, Republic of Korea*

*\*Fax: 61-2-9514 1460; Tel: 61-2-9514 1741; E-mail: Guoxiu.Wang@uts.edu.au*

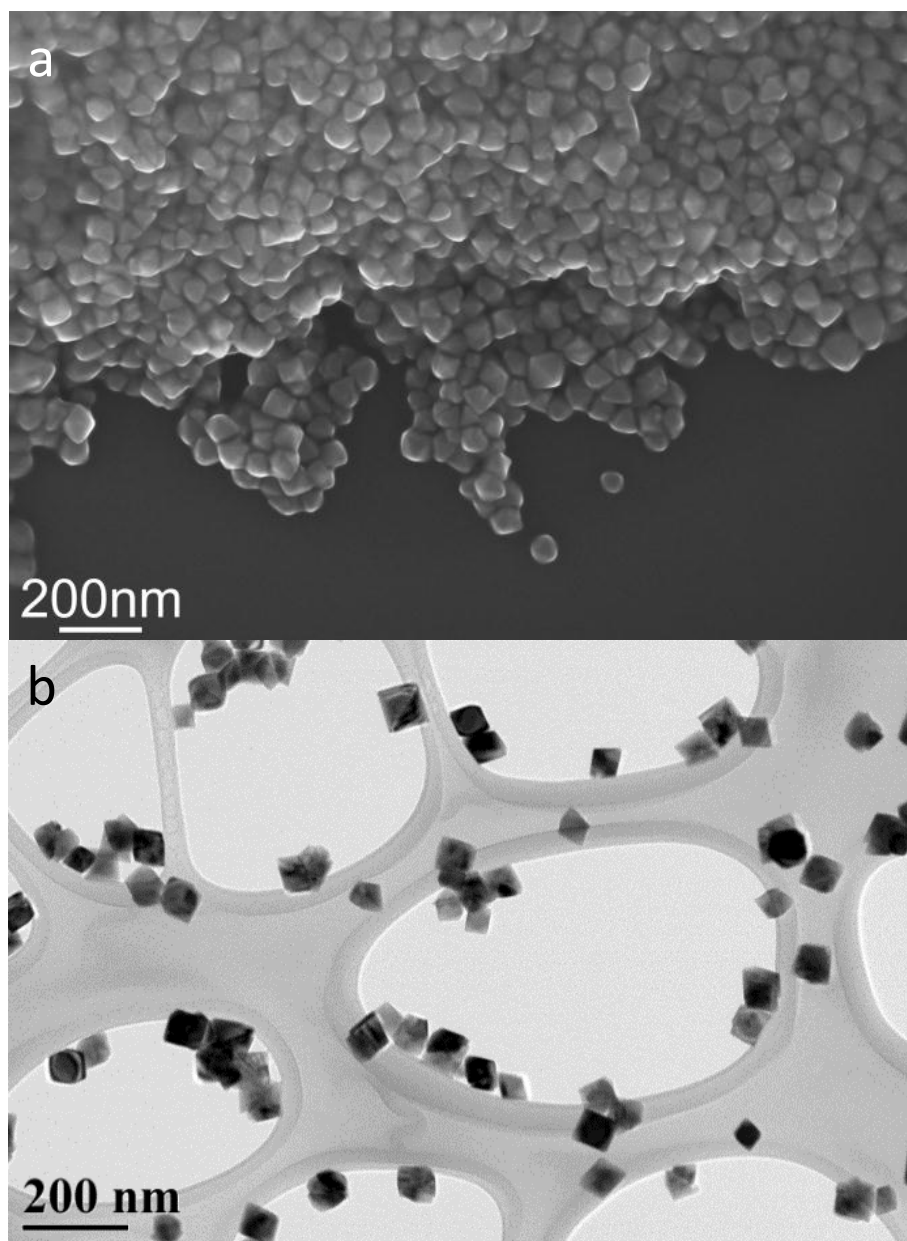

**Figure S1.** Low magnification FESEM image (a) and TEM image (b) of as-prepared octahedral SnO<sub>2</sub> nanocrystals, showing the homogenous size distribution.

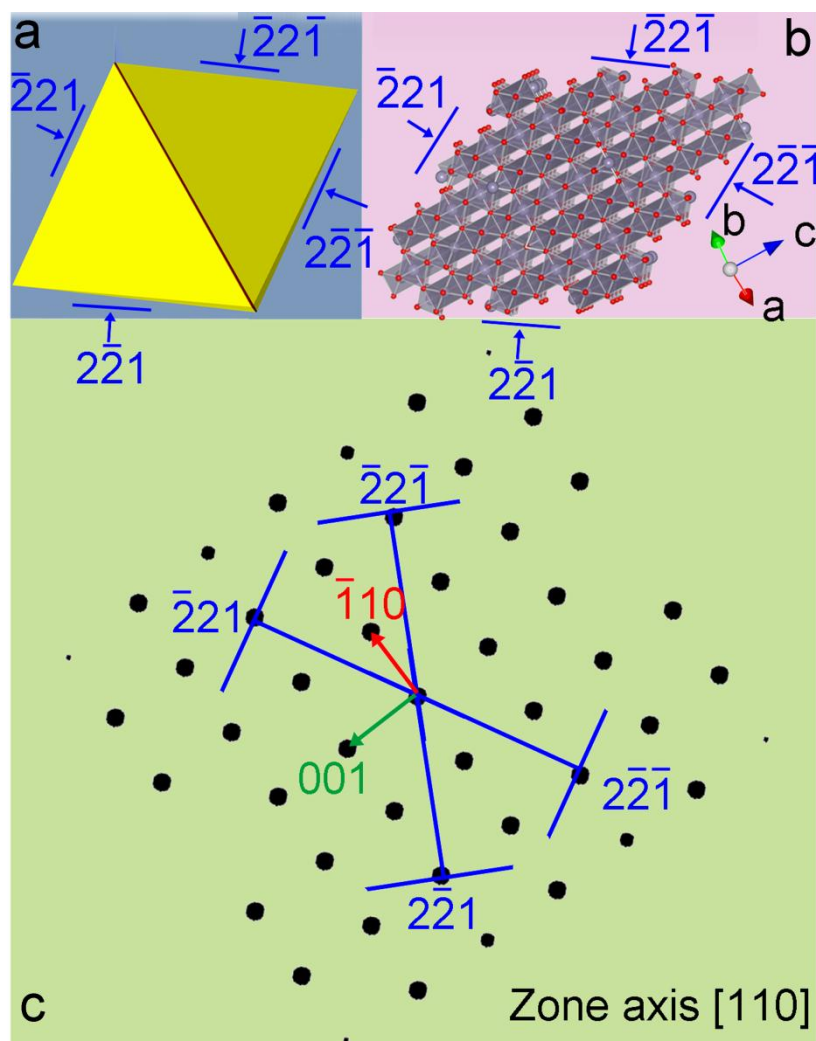

**Figure S2.** Schematic illustration of octahedral  $\text{SnO}_2$  nanocrystals viewed along the  $[110]$  direction. (a) The geometric model, (b) The simulated crystal structure, and (c) The simulated electron diffraction pattern along the  $[110]$  zone axis. The relationship between the rhombic outline and the crystal planes along the  $[110]$  direction can be identified and the pyramid planes can be indexed as the  $\{221\}$  facet.

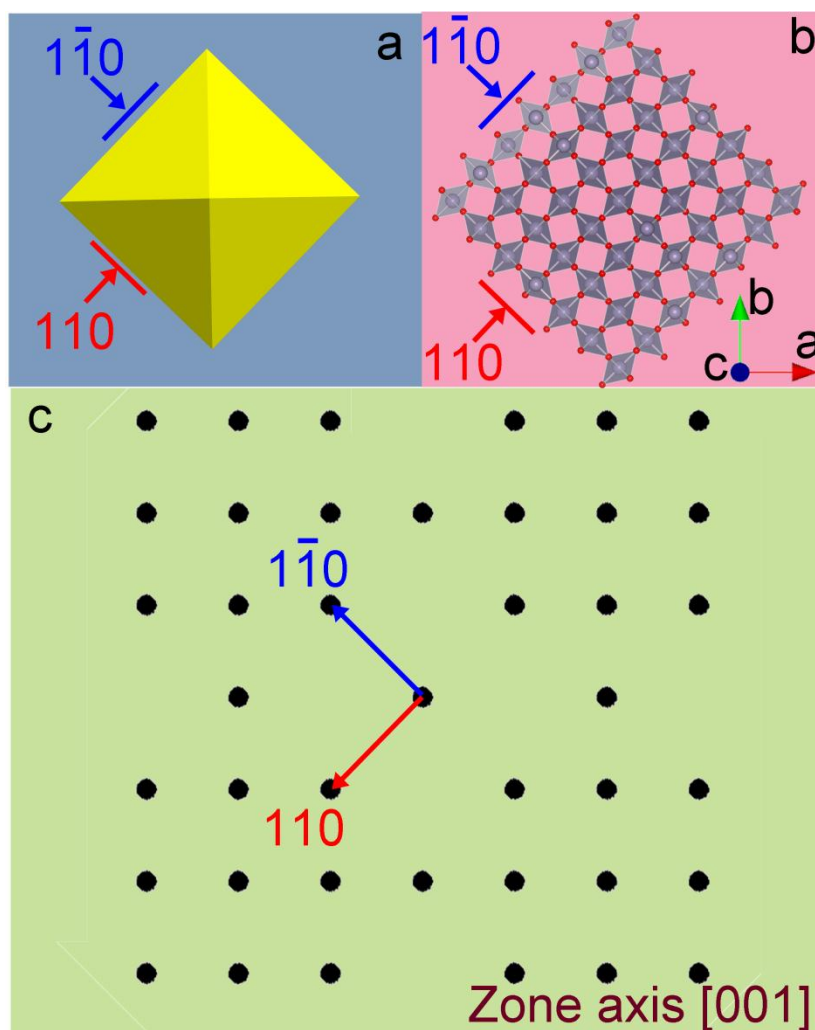

**Figure S3.** Schematic illustration of the octahedral  $\text{SnO}_2$  nanocrystal viewed along the  $[001]$  direction. (a) The geometric model, (b) The simulated crystal structure and (c) The simulated electron diffraction pattern along the  $[001]$  zone axis. The relationship between the squared outline and the crystal planes along the  $[001]$  direction can be identified.

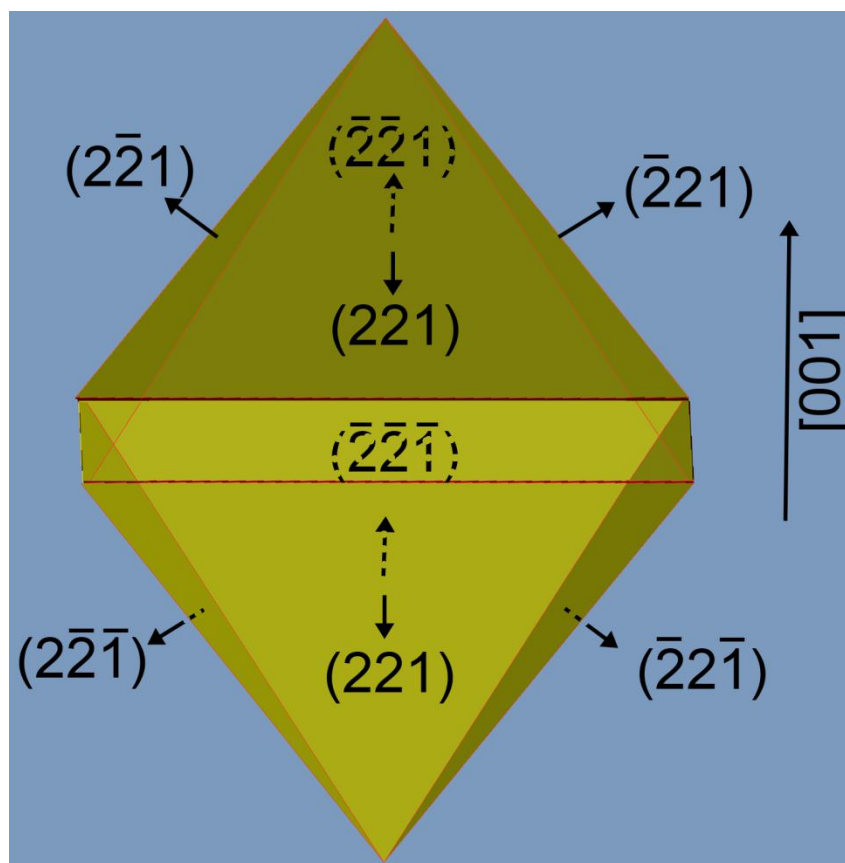

**Figure S4.** The geometric model of the as-prepared octahedral SnO<sub>2</sub> nanocrystals, in which different facets and the growth direction have been labelled.

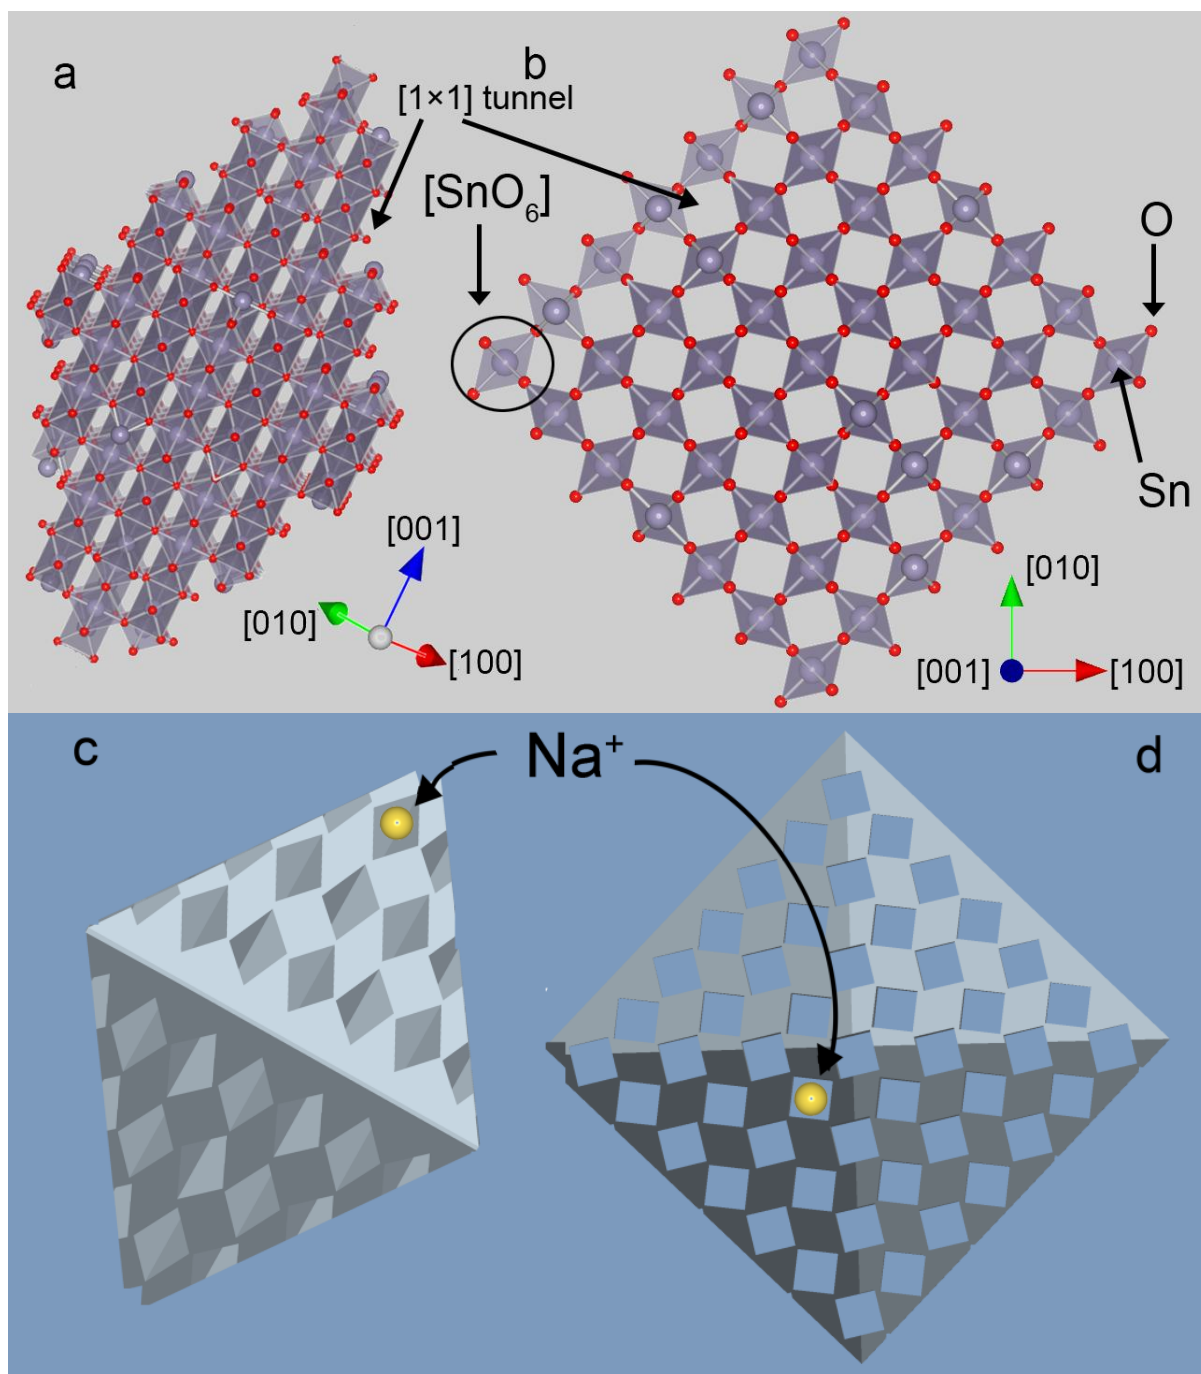

**Figure S5.** The crystal structure of octahedral  $\text{SnO}_2$  nanocrystals viewed from the  $[110]$  (a) and  $[001]$  (b) directions. The  $\text{Sn}^{4+}$  and  $\text{O}^{2-}$  ions, coloured in grey and red, respectively. From (b), we can directly observe the  $2 \times (1 \times 1)$  tunnels composed of individual chains of the  $\text{SnO}_6$  octahedral units. (c) and (d) are their geometric models, corresponding to (a) and (b), respectively.

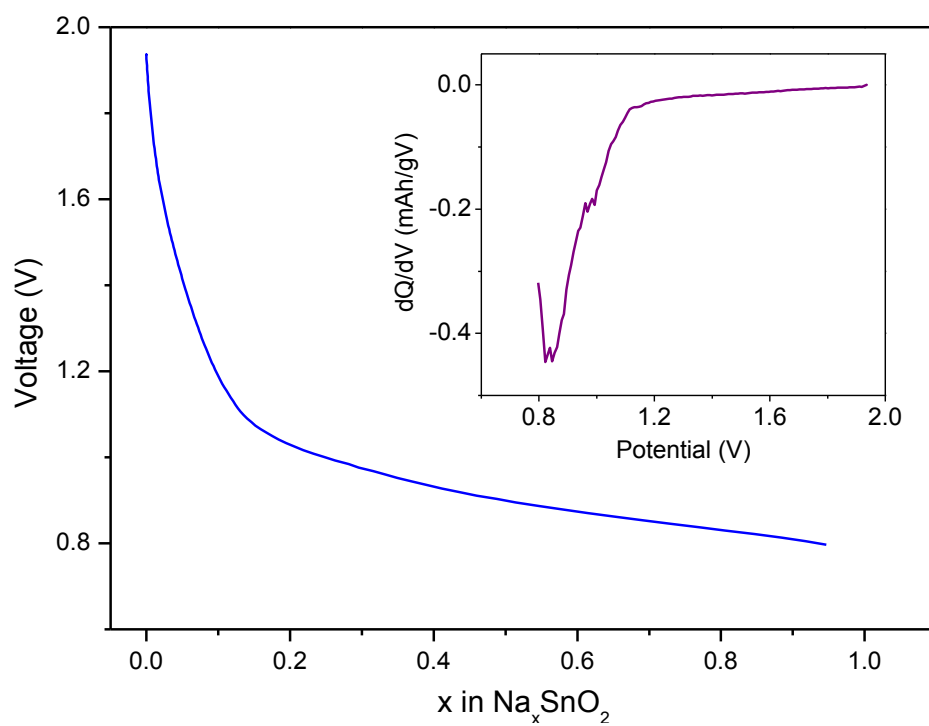

**Figure S6.** The discharge profile of SnO<sub>2</sub> nanocrystal electrode, which was discharged to 0.8 V. The inset is the corresponding differential discharge capacity versus voltage.



### **Synthesis of the nanometre-sized SnO<sub>2</sub> particles**

The nanometre-sized SnO<sub>2</sub> particles were synthesized by a hydrothermal method. In a typical synthesis process, 9 ml 6 M NaOH (Sigma-Aldrich, ≥ 99%) solution was added into 10 ml 2 M SnCl<sub>2</sub>·5H<sub>2</sub>O (Sigma-Aldrich, ≥ 98%) solution under vigorous stirring. The mixture was then transferred into a Teflon lined autoclave (25 ml in capacity) and heated at 180 °C for 12 hours in an air-flow electric oven. After cooling down to room temperature, the black product was collected by centrifugation and washed thoroughly with de-ionised water for several times. After drying at 60 °C in vacuum oven overnight, the products were further sintered in tube furnace at 500 °C for 5 hours.

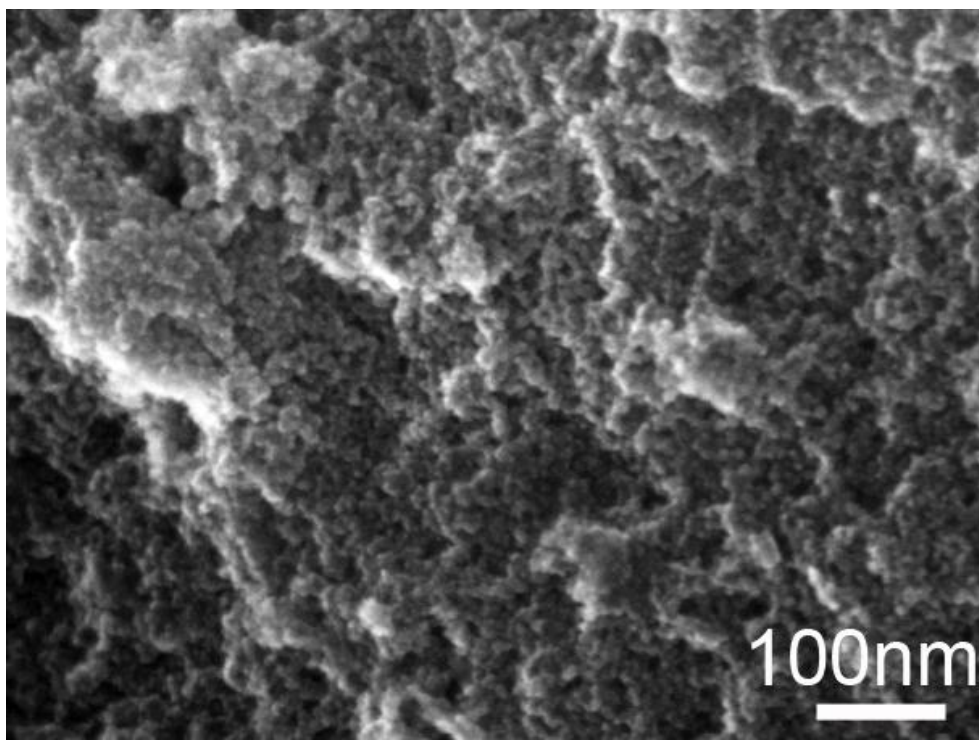

**Figure S7. SEM of nanometre-sized SnO<sub>2</sub> particles**



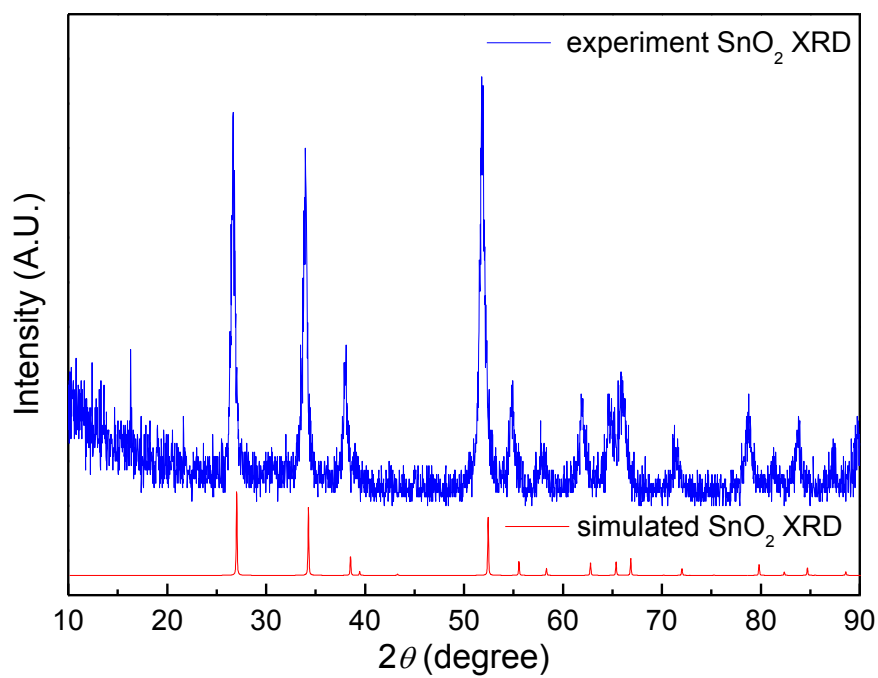

**Figure S8.** XRD pattern of nanometre-sized SnO<sub>2</sub> particles

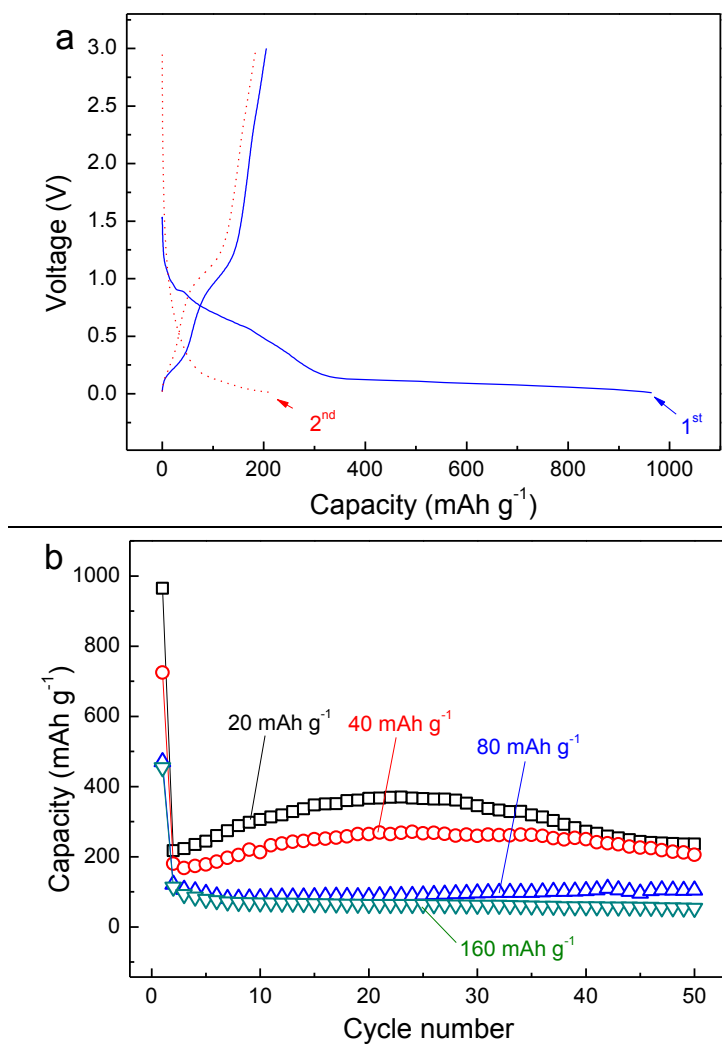

**Figure S9.** (a) Discharge and charge profiles of nanometre-sized SnO<sub>2</sub> in the 1<sup>st</sup> and 2<sup>nd</sup> cycles. (b) Discharge capacity vs. cycle number of nanometre-sized SnO<sub>2</sub> at current densities of 20, 40, 80, and 160 mA g<sup>-1</sup>.

**Table S1.** d-Spacing & Miller Indices of SnO<sub>2</sub>, Sn, Na<sub>2</sub>O and Na<sub>9</sub>Sn<sub>4</sub>.

| SnO <sub>2</sub> (71-0652) |       | Sn (87-0794) |       | Na <sub>2</sub> O (77-2148) |       | Na <sub>9</sub> Sn <sub>4</sub> (31-1326) |       |
|----------------------------|-------|--------------|-------|-----------------------------|-------|-------------------------------------------|-------|
| d-spacing                  | h k l | d-spacing    | h k l | d-spacing                   | h k l | d-spacing                                 | h k l |
| 3.3502                     | 1 1 0 | 3.74643      | 1 1 1 | 3.2049                      | 1 1 1 | 3.6791                                    | 115   |
| 3.1866                     | 0 0 1 | 2.2942       | 2 2 0 | 2.775                       | 2 0 0 | 3.4021                                    | 026   |
| 2.3692                     | 2 0 0 | 1.9565       | 3 1 1 | 1.9622                      | 2 2 0 | 2.9620                                    | 0010  |
| 2.1189                     | 2 1 0 | 1.8732       | 2 2 2 | 1.6733                      | 3 1 1 | 2.9073                                    | 028   |
| 1.7644                     | 2 1 1 | 1.6223       | 4 0 0 | 1.3875                      | 4 0 0 | 2.5453                                    | 134   |
| 1.6751                     | 2 2 0 | 1.4887       | 3 3 1 | 1.2732                      | 3 3 1 | 2.3756                                    | 206   |
| 1.5933                     | 0 0 2 | 1.3246       | 4 2 2 | 1.2410                      | 4 2 0 | 2.1870                                    | 138   |
| 1.4983                     | 3 1 0 | 1.2488       | 5 1 1 | 1.1329                      | 4 2 2 | 2.1200                                    | 046   |
